# Supplementary material for: Early stratification of radiotherapy response by activatable inflammation magnetic resonance imaging
Source: PubMed Central journal article supplement (PMC7295999; doi:10.1038/s41467-020-16771-y), 2020-06-15
Supplement: 41467_2020_16771_MOESM2_ESM.pdf [file 41467_2020_16771_MOESM2_ESM.pdf]

To view the full contents of this document, you need a later version of the PDF viewer. You can upgrade to the latest version of Adobe Reader from [www.adobe.com/products/acrobat/readstep2.html](http://www.adobe.com/products/acrobat/readstep2.html)

For further support, go to [www.adobe.com/support/products/acrreader.html](http://www.adobe.com/support/products/acrreader.html)
